# Supplementary material
Source: PubMed Central journal article supplement (PMC6485371)

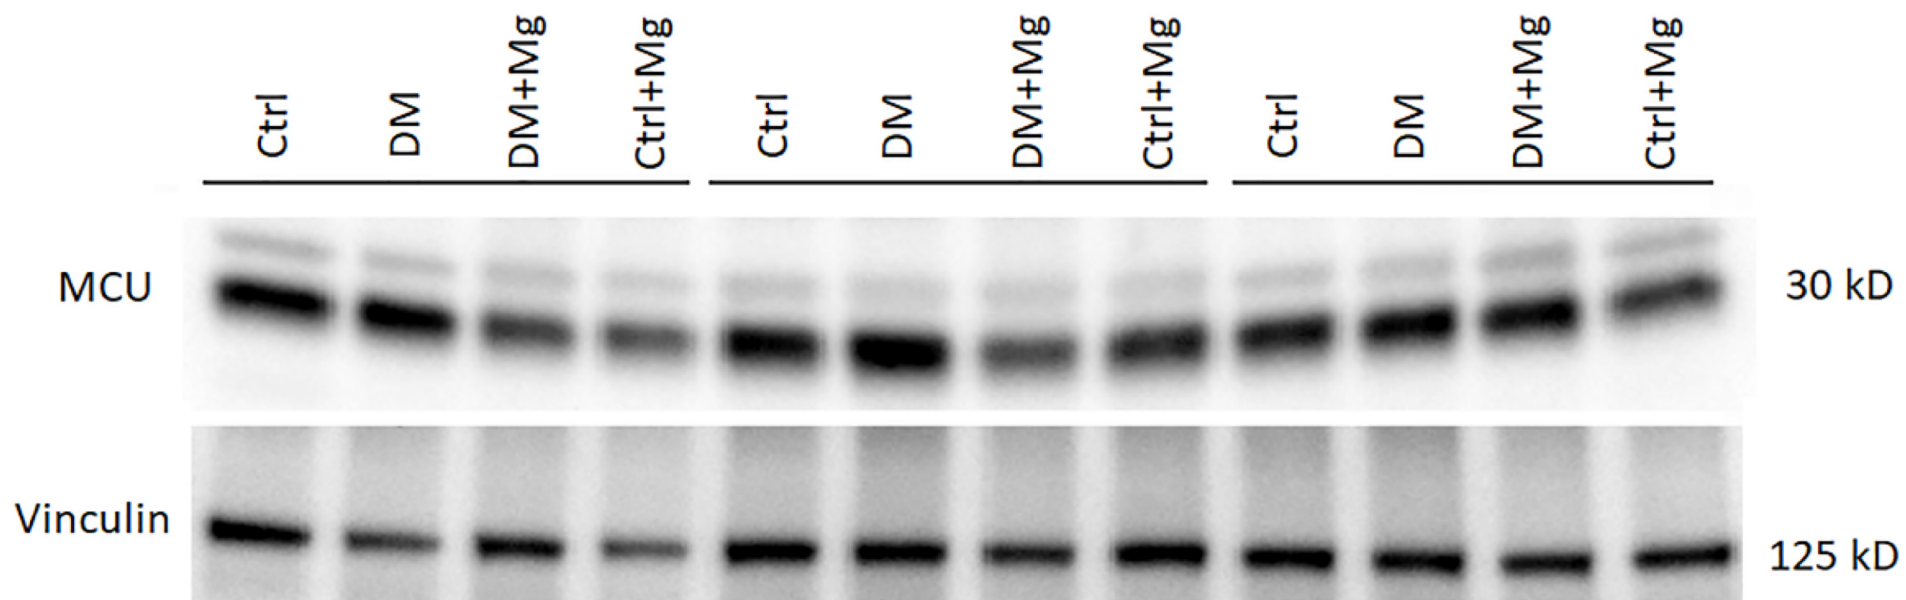

Supplement: jciinsight-4-123182-s139.pdf [file jciinsight-4-123182-s139.pdf]
